# Supplementary material
Source: PubMed Central journal article supplement (PMC3927148)
Supplement: NIHMS553566-supplement-1_si_001.pdf [file NIHMS553566-supplement-1_si_001.pdf]

## Pulsed EPR Spectroscopy of $^{33}\text{S}$ -Labeled Molybdopterin in Sulfite Oxidase

Eric L. Klein,<sup>1,3</sup> Abdel Ali Belaidi,<sup>2</sup> Arnold M. Raitsimring,<sup>1</sup> Amanda C. Davis,<sup>1</sup> Tobias Krämer,<sup>3</sup>  
Andrei V. Astashkin,<sup>1</sup> Frank Neese,<sup>3</sup> Günter Schwarz,<sup>2</sup> John H. Enemark<sup>1\*</sup>

1. Department of Chemistry and Biochemistry, The University of Arizona, 1306 E. University Blvd., Tucson, AZ 85721-0041, USA
2. Institute of Biochemistry, University of Cologne, Zùlpicher Str. 47, 50674 Cologne, Germany
3. Max Planck Institute for Chemical Energy Conversion, Stiftstr. 34-36, 45470 Mùlheim an der Ruhr, Germany

\*.jenemark@email.arizona.edu

Phone: 520 621-2245

Fax: 520 621-8065

## Supporting Information

### Orbital Analysis for the Energy-Minimized Mo(V) DFT Model

The frontier orbital energy diagram for the optimized structure of the SO active site model is depicted in Figure S1, showing the canonical Kohn-Sham orbitals. The orbital scheme is typical for a Mo(V) center with  $d^1$  configuration. Spin polarization effects strongly stabilize the majority spin orbitals such that the singly-occupied MO  $168\alpha$  is shifted below the highest occupied orbitals of mainly ligand character. As a result of strong intermixing between metal- and ligand-based orbitals, the  $d_{xy}$ -character (in the chosen coordinate system) is spread over orbitals  $168\alpha$  and  $169\alpha$  (~26% Mo character in each orbital, see Table S1). In the former, the  $d_{xy}$  orbital mixes with the out-of-plane  $p_z$  orbitals of the MPT S atoms, while the latter mixes  $d_{xy}$  orbital character with the  $S^V$  orbital of cysteine.<sup>1,2</sup> Similar interactions have been found for the DFT model  $[\text{MoO}(\text{SCH}_3)(\text{dithiolene})\text{OH}]^-$  (dithiolene = SCHCHS),<sup>3</sup> for example, which features the same inner-sphere coordination environment as SO. The empty  $\beta$ -spin  $d_{xy}$  orbital ( $172\beta$ ) corresponds to the lowest unoccupied MO (LUMO) and is of predominantly Mo character (77%). Above the  $d_{xz}$  orbital lie the remaining unoccupied metal d-orbitals, having  $d_{yz}$  ( $173\beta$ ),  $d_{xz}$  ( $174\beta$ ),  $d_{x^2-y^2}$  ( $176\beta$ ), and  $d_z^2$  ( $177\beta$ ) character, respectively.

Additionally, four corresponding empty  $\alpha$ -spin d-orbitals can be readily identified within the vacant  $\alpha$ -spin manifold.

A chemically more intuitive picture can be obtained by visualizing the electronic structure in terms of localized molecular orbitals (LMOs). The Pipek-Mezey population-localization protocol yields 10 molecular orbitals of mainly d-character localized on the Mo center, shown in Figure S2. Note that the MO diagram focuses entirely on the metal-centered orbital manifold, omitting ligand-orbitals. Furthermore, the energy splitting is represented in a schematic way since all information about orbital energies is lost in the process. All 10 orbitals of predominantly metal d-character can be identified in the diagram, and from this the  $d_{xy}$  character of the singly occupied orbital becomes much more recognizable.

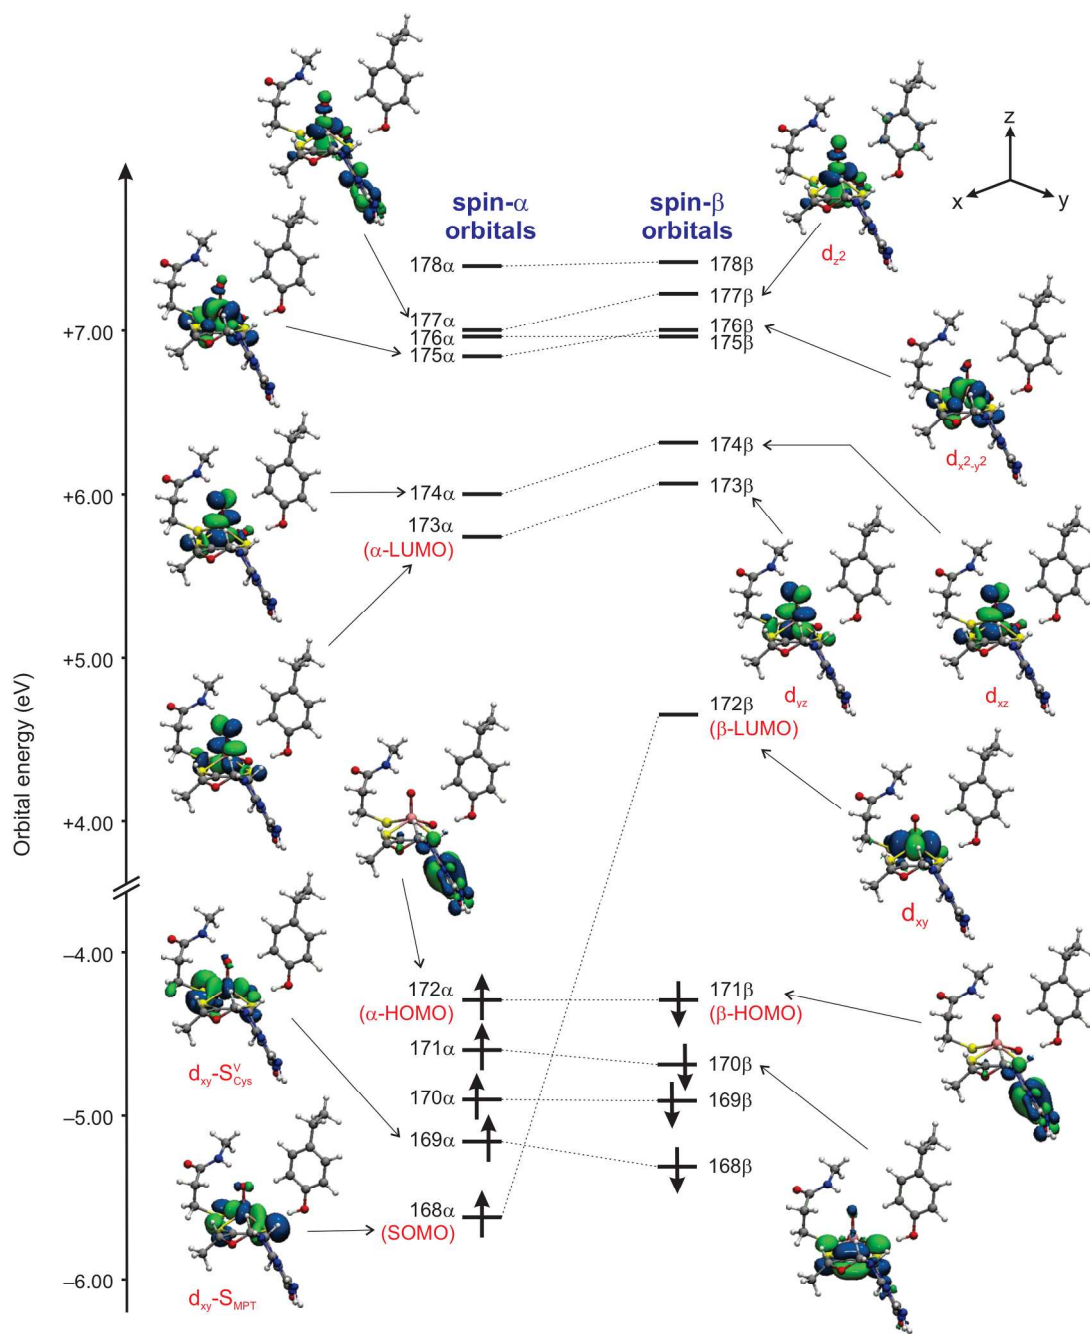

**Figure S1.** Canonical Kohn-Sham molecular orbital diagram (frontier orbital region) for the computational SO active site model (B3LYP/TZVP/ZORA). HOMO = Highest Molecular Orbital; LUMO = Lowest Unoccupied Molecular Orbital.



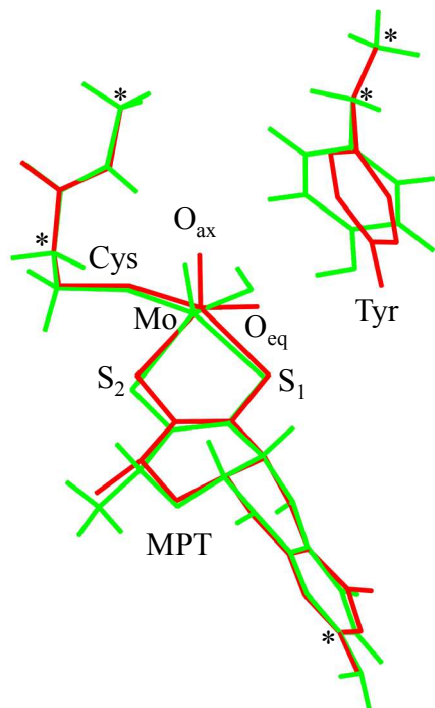

**Figure S3.** Overlay of the crystallographic atom coordinates (from pdb 1SOX) and the minimum-energy geometry optimized Mo(V) structure, including added H atoms (red and green structures, respectively). Atoms marked by asterisks were constrained to their relative crystallographic coordinate positions. S<sub>1</sub> and S<sub>2</sub> correspond to index numbers 30 and 32, respectively, in each of the DFT models (see below).

**Table S1.** Compositions of selected canonical KS orbitals in the frontier orbital region.<sup>a</sup>

| Spin- $\alpha$ | Center |       |       |       |       |       |
|----------------|--------|-------|-------|-------|-------|-------|
|                | Mo(36) | S(4)  | S(30) | S(32) | O(16) | O(37) |
| 168 $\alpha$   | 26.4%  | 14.0% | 28.0% | 12.7% | 4.3%  | 2.9%  |
| 169 $\alpha$   | 26.8%  | 38.6% | 10.6% | 4.3%  | 2.2%  | 2.1%  |
| 173 $\alpha$   | 59.0%  | 8.2%  | 8.6%  | 0.0%  | 0.0%  | 19.1% |
| 174 $\alpha$   | 61.5%  | 0.6%  | 0.8%  | 9.7%  | 4.5%  | 18.5% |
| 175 $\alpha$   | 41.5%  | 11.8% | 8.6%  | 3.8%  | 4.2%  | 5.1%  |
| 177 $\alpha$   | 34.1%  | 0.8%  | 31.0% | 5.6%  | 3.5%  | 8.9%  |

  

| Spin- $\beta$ | Center |      |       |       |       |       |
|---------------|--------|------|-------|-------|-------|-------|
|               | Mo(36) | S(4) | S(30) | S(32) | O(16) | O(37) |
| 172 $\beta$   | 76.7%  | 6.4% | 2.4%  | 2.6%  | 2.2%  | 0.5%  |
| 173 $\beta$   | 62.1%  | 7.4% | 7.5%  | 0.0%  | 0.0%  | 17.5% |
| 174 $\beta$   | 64.2%  | 0.6% | 0.8%  | 9.0%  | 4.2%  | 16.4% |
| 176 $\beta$   | 36.9%  | 9.9% | 7.5%  | 4.7%  | 4.1%  | 2.0%  |
| 177 $\beta$   | 48.3%  | 1.8% | 4.6%  | 5.9%  | 4.0%  | 13.0% |

<sup>a</sup>The numbers in parentheses correspond to the atom coordinates of the DFT model (see below).

## ORCA Input Files and Optimized Model Coordinates

Input used for geometry optimization calculations:

```
! BP86 TZVP RI TZV/J OPT GRID4 NormalPrint VDW10
%geom
Constraints
{ C 0 C }
{ C 6 C }
{ C 7 C }
{ C 8 C }
{ C 18 C }
# additional angle constraints for the models with dihedral angles defined at
# 120, 150, 180, 210, and 240 degrees. Atoms 68 and 69 are dummy atoms located
# between the dithiolene sulfurs and adjacent carbon atoms, as described within
# the Materials and Methods section.
{ A 36 68 69 C }
{ A 30 68 32 C }
{ A 29 69 31 C }
end
end
* xyz -1 2
<atom coordinates>
*
%cosmo
epsilon 4
end
```

Input used for all properties calculations:

```
! B3LYP TZVP ZORA COSMO TightSCF NPA GRID4 LargePrint VDW10
* xyz -1 2
<atom coordinates>
*
%cosmo
epsilon 4
end
%rel
    SOCType 3
    SOCFlags 1,3,3,0
    method ZORA
    modelpot 1,1,1,1
    picturechange true
    modeldens rhoZORA
end
%eprnmr
    gtensor 1
    Nuclei = all Mo {aiso, adip, aorb, rho, fgrad}
    Nuclei = 38 {aiso, adip, aorb, rho, fgrad}
    Nuclei = 17 {aiso, adip, aorb, rho, fgrad}
    Nuclei = 68 {aiso, adip, aorb, rho, fgrad}
    Nuclei = 53 {aiso, adip, aorb, rho, fgrad}
    Nuclei = 31 {aiso, adip, aorb, rho, fgrad}
    Nuclei = 33 {aiso, adip, aorb, rho, fgrad}
    Nuclei = 5 {aiso, adip, aorb, rho, fgrad}
end
```

Optimized atom coordinates:

*Dihedral Angle = "relaxed"*

|    |         |          |         |
|----|---------|----------|---------|
| C  | -1.6330 | 2.8589   | 1.6059  |
| C  | -0.5316 | 3.5803   | 2.3827  |
| O  | -0.4775 | 4.8226   | 2.4282  |
| C  | -1.5257 | 3.0956   | 0.0964  |
| S  | -0.0422 | 2.3194   | -0.7186 |
| N  | 0.3581  | 2.7822   | 3.0276  |
| C  | 1.5025  | 3.3233   | 3.7538  |
| C  | 5.5613  | -1.6784  | 5.8455  |
| C  | 4.1389  | -2.2351  | 5.5830  |
| C  | 3.8534  | -2.2162  | 4.0966  |
| C  | 3.3564  | -1.0577  | 3.4803  |
| C  | 4.2123  | -3.2897  | 3.2626  |
| C  | 3.2330  | -0.9571  | 2.0941  |
| C  | 4.0886  | -3.2111  | 1.8729  |
| C  | 3.6029  | -2.0363  | 1.2709  |
| O  | 3.5176  | -1.9897  | -0.0886 |
| O  | 1.8811  | 0.0000   | -0.7847 |
| N  | -4.1717 | -7.7399  | -1.1233 |
| C  | -3.9495 | -8.4585  | -2.2020 |
| N  | -4.5112 | -9.7163  | -2.3188 |
| N  | -3.1297 | -8.0373  | -3.2105 |
| C  | -2.3905 | -6.8255  | -3.1749 |
| O  | -1.6836 | -6.5077  | -4.1504 |
| N  | -1.8619 | -4.8941  | -1.7725 |
| C  | -2.0087 | -4.2296  | -0.4701 |
| C  | -3.4228 | -4.4100  | 0.1244  |
| N  | -3.7829 | -5.7926  | 0.0959  |
| C  | -2.5858 | -6.0802  | -1.9688 |
| C  | -3.5109 | -6.5438  | -1.0346 |
| C  | -1.7091 | -2.7561  | -0.5839 |
| S  | 0.0039  | -2.3053  | -0.7575 |
| C  | -2.7037 | -1.8339  | -0.5774 |
| S  | -2.3268 | -0.0932  | -0.6646 |
| C  | -4.1730 | -2.2162  | -0.4754 |
| O  | -4.3677 | -3.6378  | -0.6458 |
| C  | -5.0660 | -1.5336  | -1.5078 |
| Mo | 0.0000  | 0.0000   | 0.0000  |
| O  | 0.0000  | 0.0000   | 1.7379  |
| H  | -2.5885 | 3.2917   | 1.9463  |
| H  | -1.6545 | 1.7849   | 1.8302  |
| H  | -2.4215 | 2.7142   | -0.4114 |
| H  | -1.4396 | 4.1712   | -0.1128 |
| H  | 0.3276  | 1.7798   | 2.8221  |
| H  | 1.1975  | 4.2360   | 4.2804  |
| H  | 5.8044  | -1.6767  | 6.9203  |
| H  | 5.6463  | -0.6467  | 5.4738  |
| H  | 4.0656  | -3.2618  | 5.9758  |
| H  | 3.3971  | -1.6253  | 6.1226  |
| H  | 3.0657  | -0.2051  | 4.1008  |
| H  | 4.6004  | -4.2102  | 3.7089  |
| H  | 2.8392  | -0.0480  | 1.6393  |
| H  | 4.3600  | -4.0566  | 1.2375  |
| H  | 2.9515  | -1.2034  | -0.3755 |
| H  | -5.2754 | -9.8740  | -1.6653 |
| H  | -4.7140 | -10.0448 | -3.2603 |
| H  | -2.9684 | -8.6205  | -4.0315 |
| H  | -1.8823 | -4.2570  | -2.5695 |
| H  | -1.2997 | -4.6876  | 0.2425  |
| H  | -3.4369 | -4.0586  | 1.1720  |
| H  | -4.5968 | -6.0861  | 0.6316  |

|   |         |         |         |
|---|---------|---------|---------|
| H | -4.5242 | -1.9411 | 0.5424  |
| H | -5.0410 | -0.4435 | -1.3793 |
| H | -4.7282 | -1.7761 | -2.5251 |
| H | -6.1018 | -1.8790 | -1.3821 |
| H | 1.8484  | 2.5811  | 4.4835  |
| H | 2.3345  | 3.5772  | 3.0769  |
| H | 6.3158  | -2.2864 | 5.3247  |
| H | 2.2653  | 0.8785  | -0.9614 |

*Dihedral Angle = 120*

|    |         |         |         |
|----|---------|---------|---------|
| C  | -1.6921 | 2.9107  | 1.4729  |
| C  | -0.6236 | 3.5406  | 2.3737  |
| O  | -0.5315 | 4.7702  | 2.4983  |
| C  | -1.4101 | 3.1671  | -0.0107 |
| S  | 0.1136  | 2.3213  | -0.6629 |
| N  | 0.1915  | 2.6664  | 3.0308  |
| C  | 1.3138  | 3.1384  | 3.8337  |
| C  | 4.9720  | -2.1356 | 5.9945  |
| C  | 3.5441  | -2.6083 | 5.6206  |
| C  | 3.3589  | -2.5089 | 4.1223  |
| C  | 2.9682  | -1.3000 | 3.5273  |
| C  | 3.7334  | -3.5596 | 3.2684  |
| C  | 2.9690  | -1.1284 | 2.1445  |
| C  | 3.7277  | -3.4116 | 1.8809  |
| C  | 3.3569  | -2.1854 | 1.2977  |
| O  | 3.3982  | -2.0744 | -0.0522 |
| O  | 1.9076  | 0.0000  | -0.7338 |
| N  | -4.0184 | -7.1352 | 1.9856  |
| C  | -4.3008 | -8.0929 | 1.1401  |
| N  | -4.9899 | -9.2354 | 1.5703  |
| N  | -3.8976 | -8.0628 | -0.1671 |
| C  | -3.1189 | -7.0149 | -0.7371 |
| O  | -2.8302 | -7.0372 | -1.9429 |
| N  | -1.9434 | -4.9640 | -0.1781 |
| C  | -1.6261 | -3.8876 | 0.7643  |
| C  | -2.7064 | -3.7802 | 1.8611  |
| N  | -2.9689 | -5.0774 | 2.4234  |
| C  | -2.7574 | -6.0071 | 0.2209  |
| C  | -3.2544 | -6.0991 | 1.5173  |
| C  | -1.4978 | -2.5620 | 0.0505  |
| S  | 0.0046  | -2.2902 | -0.8693 |
| C  | -2.5052 | -1.6421 | 0.1012  |
| S  | -2.3398 | -0.0541 | -0.6996 |
| C  | -3.8009 | -1.8971 | 0.8490  |
| O  | -3.9243 | -3.2604 | 1.3032  |
| C  | -5.0447 | -1.6284 | 0.0050  |
| Mo | 0.0000  | 0.0000  | 0.0000  |
| O  | 0.0000  | 0.0000  | 1.7335  |
| H  | -2.6428 | 3.4051  | 1.7320  |
| H  | -1.8099 | 1.8337  | 1.6547  |
| H  | -2.2666 | 2.8442  | -0.6181 |
| H  | -1.2433 | 4.2417  | -0.1750 |
| H  | 0.1746  | 1.6837  | 2.7348  |
| H  | 0.9950  | 4.0057  | 4.4265  |
| H  | 5.1553  | -2.1893 | 7.0807  |
| H  | 5.1249  | -1.0965 | 5.6680  |
| H  | 3.3952  | -3.6464 | 5.9609  |
| H  | 2.7985  | -1.9869 | 6.1430  |
| H  | 2.6609  | -0.4637 | 4.1625  |
| H  | 4.0386  | -4.5175 | 3.7015  |
| H  | 2.6542  | -0.1818 | 1.7067  |
| H  | 4.0027  | -4.2370 | 1.2222  |



|   |         |         |         |
|---|---------|---------|---------|
| H | 2.8965  | -1.2444 | -0.3370 |
| H | -5.3330 | -9.0951 | 2.5197  |
| H | -5.7429 | -9.5326 | 0.9493  |
| H | -4.0773 | -8.8451 | -0.7944 |
| H | -1.9622 | -4.7356 | -1.1694 |
| H | -0.6687 | -4.1062 | 1.2697  |
| H | -2.3394 | -3.1086 | 2.6589  |
| H | -3.5848 | -5.0839 | 3.2348  |
| H | -3.8099 | -1.2277 | 1.7373  |
| H | -5.0863 | -0.5745 | -0.2989 |
| H | -5.0238 | -2.2597 | -0.8939 |
| H | -5.9413 | -1.8713 | 0.5922  |
| H | 1.6407  | 2.3309  | 4.5018  |
| H | 2.1643  | 3.4507  | 3.2041  |
| H | 5.7233  | -2.7567 | 5.4846  |
| H | 2.2812  | 0.8876  | -0.8852 |

*Dihedral Angle = 150*

|    |         |         |         |
|----|---------|---------|---------|
| C  | -1.5758 | 2.9381  | 1.5716  |
| C  | -0.4472 | 3.5790  | 2.3847  |
| O  | -0.3243 | 4.8096  | 2.4572  |
| C  | -1.4111 | 3.1734  | 0.0680  |
| S  | 0.0527  | 2.3239  | -0.7017 |
| N  | 0.3801  | 2.7130  | 3.0384  |
| C  | 1.5298  | 3.1948  | 3.7964  |
| C  | 5.3233  | -2.0450 | 5.8012  |
| C  | 3.8842  | -2.5300 | 5.4918  |
| C  | 3.6288  | -2.4462 | 4.0040  |
| C  | 3.1689  | -1.2569 | 3.4203  |
| C  | 3.9937  | -3.4933 | 3.1413  |
| C  | 3.0888  | -1.1009 | 2.0379  |
| C  | 3.9101  | -3.3608 | 1.7554  |
| C  | 3.4653  | -2.1549 | 1.1823  |
| O  | 3.4239  | -2.0623 | -0.1696 |
| O  | 1.8892  | 0.0000  | -0.7719 |
| N  | -4.4523 | -7.5467 | -1.2104 |
| C  | -4.3391 | -8.1895 | -2.3450 |
| N  | -5.0484 | -9.3797 | -2.5591 |
| N  | -3.4959 | -7.7764 | -3.3406 |
| C  | -2.6458 | -6.6360 | -3.2460 |
| O  | -1.9397 | -6.3038 | -4.2090 |
| N  | -1.9134 | -4.9012 | -1.7076 |
| C  | -1.9970 | -4.2088 | -0.4197 |
| C  | -3.3964 | -4.3892 | 0.2073  |
| N  | -3.7792 | -5.7750 | 0.1815  |
| C  | -2.7323 | -5.9815 | -1.9688 |
| C  | -3.6516 | -6.4484 | -1.0342 |
| C  | -1.6985 | -2.7338 | -0.5638 |
| S  | 0.0101  | -2.2981 | -0.7956 |
| C  | -2.6930 | -1.8096 | -0.5397 |
| S  | -2.3307 | -0.0663 | -0.6626 |
| C  | -4.1549 | -2.1937 | -0.3872 |
| O  | -4.3653 | -3.6166 | -0.5171 |
| C  | -5.0690 | -1.5460 | -1.4240 |
| Mo | 0.0000  | 0.0000  | 0.0000  |
| O  | 0.0000  | 0.0000  | 1.7343  |
| H  | -2.5046 | 3.4370  | 1.8950  |
| H  | -1.6806 | 1.8648  | 1.7809  |
| H  | -2.3112 | 2.8405  | -0.4677 |
| H  | -1.2609 | 4.2457  | -0.1244 |
| H  | 0.3279  | 1.7213  | 2.7857  |
| H  | 1.2391  | 4.0918  | 4.3586  |

|   |         |         |         |
|---|---------|---------|---------|
| H | 5.5521  | -2.0885 | 6.8792  |
| H | 5.4554  | -1.0076 | 5.4602  |
| H | 3.7581  | -3.5659 | 5.8480  |
| H | 3.1575  | -1.9099 | 6.0415  |
| H | 2.8679  | -0.4248 | 4.0640  |
| H | 4.3529  | -4.4357 | 3.5668  |
| H | 2.7193  | -0.1703 | 1.6084  |
| H | 4.1781  | -4.1832 | 1.0900  |
| H | 2.9087  | -1.2347 | -0.4330 |
| H | -5.7177 | -9.5232 | -1.8039 |
| H | -5.5063 | -9.4391 | -3.4690 |
| H | -3.3748 | -8.3227 | -4.1919 |
| H | -1.5680 | -4.3808 | -2.5102 |
| H | -1.2672 | -4.6483 | 0.2849  |
| H | -3.3606 | -4.0494 | 1.2600  |
| H | -4.6446 | -5.9975 | 0.6706  |
| H | -4.4819 | -1.8854 | 0.6307  |
| H | -5.0489 | -0.4525 | -1.3296 |
| H | -4.7330 | -1.8198 | -2.4334 |
| H | -6.0980 | -1.9036 | -1.2780 |
| H | 1.8564  | 2.4097  | 4.4906  |
| H | 2.3717  | 3.4647  | 3.1367  |
| H | 6.0571  | -2.6654 | 5.2655  |
| H | 2.2571  | 0.8768  | -0.9818 |

*Dihedral Angle = 180*

|   |         |         |         |
|---|---------|---------|---------|
| C | -1.6844 | 2.8868  | 1.6207  |
| C | -0.6005 | 3.5537  | 2.4739  |
| O | -0.5518 | 4.7845  | 2.6067  |
| C | -1.4663 | 3.1430  | 0.1249  |
| S | 0.0589  | 2.3568  | -0.5859 |
| N | 0.2860  | 2.7115  | 3.0786  |
| C | 1.4190  | 3.2345  | 3.8361  |
| C | 5.3443  | -1.8972 | 5.8668  |
| C | 3.9168  | -2.4194 | 5.5641  |
| C | 3.6560  | -2.3685 | 4.0759  |
| C | 3.1854  | -1.1951 | 3.4694  |
| C | 4.0135  | -3.4346 | 3.2340  |
| C | 3.0862  | -1.0728 | 2.0847  |
| C | 3.9110  | -3.3359 | 1.8466  |
| C | 3.4526  | -2.1467 | 1.2494  |
| O | 3.3924  | -2.0938 | -0.1040 |
| O | 1.8957  | 0.0000  | -0.7402 |
| N | -3.6754 | -6.7564 | -4.5861 |
| C | -3.0410 | -7.0798 | -5.6845 |
| N | -3.5345 | -8.0906 | -6.5232 |
| N | -1.8487 | -6.5056 | -6.0375 |
| C | -1.1825 | -5.5094 | -5.2683 |
| O | -0.1181 | -5.0151 | -5.6686 |
| N | -1.3500 | -4.2534 | -3.1919 |
| C | -1.9276 | -4.0403 | -1.8717 |
| C | -3.4527 | -4.2819 | -1.9314 |
| N | -3.7444 | -5.5318 | -2.5791 |
| C | -1.8743 | -5.1926 | -4.0475 |
| C | -3.0812 | -5.8291 | -3.7709 |
| C | -1.6703 | -2.6403 | -1.3654 |
| S | -0.0350 | -2.3189 | -0.7682 |
| C | -2.6315 | -1.6881 | -1.3898 |
| S | -2.3166 | -0.0636 | -0.7401 |
| C | -4.0225 | -1.9520 | -1.9439 |
| O | -4.0973 | -3.2151 | -2.6412 |
| C | -4.4973 | -0.9012 | -2.9436 |

|    |         |         |         |
|----|---------|---------|---------|
| Mo | 0.0000  | 0.0000  | 0.0000  |
| O  | 0.0000  | 0.0000  | 1.7351  |
| H  | -2.6383 | 3.3540  | 1.9148  |
| H  | -1.7592 | 1.8084  | 1.8182  |
| H  | -2.3274 | 2.7790  | -0.4544 |
| H  | -1.3524 | 4.2223  | -0.0524 |
| H  | 0.2876  | 1.7286  | 2.7882  |
| H  | 1.0749  | 4.0443  | 4.4930  |
| H  | 5.5723  | -1.9188 | 6.9454  |
| H  | 5.4540  | -0.8626 | 5.5096  |
| H  | 3.8143  | -3.4516 | 5.9378  |
| H  | 3.1761  | -1.8077 | 6.1045  |
| H  | 2.8891  | -0.3488 | 4.0965  |
| H  | 4.3817  | -4.3654 | 3.6769  |
| H  | 2.7058  | -0.1537 | 1.6408  |
| H  | 4.1750  | -4.1730 | 1.1982  |
| H  | 2.8855  | -1.2711 | -0.3942 |
| H  | -4.4571 | -8.3818 | -6.2024 |
| H  | -3.5577 | -7.8389 | -7.5121 |
| H  | -1.3311 | -6.8291 | -6.8531 |
| H  | -0.5069 | -3.7569 | -3.4637 |
| H  | -1.5123 | -4.7612 | -1.1386 |
| H  | -3.8397 | -4.3225 | -0.8946 |
| H  | -4.7275 | -5.7977 | -2.5876 |
| H  | -4.7321 | -1.9872 | -1.0866 |
| H  | -4.5708 | 0.0830  | -2.4636 |
| H  | -3.7812 | -0.8343 | -3.7738 |
| H  | -5.4820 | -1.1898 | -3.3381 |
| H  | 1.8494  | 2.4245  | 4.4387  |
| H  | 2.1986  | 3.6448  | 3.1724  |
| H  | 6.0923  | -2.5092 | 5.3411  |
| H  | 2.3046  | 0.8847  | -0.7607 |

*Dihedral Angle = 210*

|   |         |         |         |
|---|---------|---------|---------|
| C | -1.6302 | 2.9796  | 1.4550  |
| C | -0.5407 | 3.6350  | 2.3111  |
| O | -0.4553 | 4.8666  | 2.4111  |
| C | -1.3627 | 3.1713  | -0.0436 |
| S | 0.1681  | 2.3238  | -0.6594 |
| N | 0.3106  | 2.7809  | 2.9507  |
| C | 1.4660  | 3.2844  | 3.6868  |
| C | 5.1528  | -1.9228 | 5.9581  |
| C | 3.7071  | -2.3963 | 5.6616  |
| C | 3.4625  | -2.3618 | 4.1700  |
| C | 3.0801  | -1.1709 | 3.5354  |
| C | 3.7688  | -3.4622 | 3.3525  |
| C | 3.0192  | -1.0645 | 2.1475  |
| C | 3.7010  | -3.3799 | 1.9617  |
| C | 3.3334  | -2.1733 | 1.3361  |
| O | 3.3051  | -2.1381 | -0.0179 |
| O | 1.9219  | 0.0000  | -0.6925 |
| N | -2.0696 | -5.0380 | -6.7831 |
| C | -1.0667 | -5.1430 | -7.6175 |
| N | -1.2034 | -5.8893 | -8.7948 |
| N | 0.1629  | -4.6007 | -7.3641 |
| C | 0.4769  | -3.8501 | -6.1912 |
| O | 1.6133  | -3.3808 | -6.0392 |
| N | -0.5164 | -2.9776 | -4.1347 |
| C | -1.4305 | -3.2979 | -3.0384 |
| C | -2.8616 | -3.4196 | -3.5996 |
| N | -2.8920 | -4.3301 | -4.7089 |
| C | -0.6349 | -3.7389 | -5.2893 |

|    |         |         |         |
|----|---------|---------|---------|
| C  | -1.8368 | -4.3623 | -5.6120 |
| C  | -1.4060 | -2.2251 | -1.9798 |
| S  | -0.0518 | -2.2984 | -0.8455 |
| C  | -2.3648 | -1.2626 | -1.9332 |
| S  | -2.3646 | -0.0355 | -0.6487 |
| C  | -3.4971 | -1.1903 | -2.9458 |
| O  | -3.3425 | -2.1397 | -4.0259 |
| C  | -3.6153 | 0.1736  | -3.6229 |
| Mo | 0.0000  | 0.0000  | 0.0000  |
| O  | 0.0000  | 0.0000  | 1.7285  |
| H  | -2.5738 | 3.4889  | 1.7091  |
| H  | -1.7463 | 1.9118  | 1.6894  |
| H  | -2.2117 | 2.7930  | -0.6315 |
| H  | -1.2227 | 4.2407  | -0.2588 |
| H  | 0.2855  | 1.7914  | 2.6859  |
| H  | 1.1627  | 4.1522  | 4.2868  |
| H  | 5.3783  | -1.9309 | 7.0376  |
| H  | 5.3022  | -0.9006 | 5.5805  |
| H  | 3.5625  | -3.4165 | 6.0536  |
| H  | 2.9887  | -1.7446 | 6.1854  |
| H  | 2.8276  | -0.2968 | 4.1432  |
| H  | 4.0694  | -4.4063 | 3.8177  |
| H  | 2.7095  | -0.1309 | 1.6797  |
| H  | 3.9248  | -4.2421 | 1.3313  |
| H  | 2.8504  | -1.2905 | -0.3324 |
| H  | -2.1788 | -6.1507 | -8.9307 |
| H  | -0.8218 | -5.4403 | -9.6274 |
| H  | 0.9557  | -4.7754 | -7.9797 |
| H  | 0.4373  | -2.7408 | -3.8605 |
| H  | -1.1763 | -4.2704 | -2.5658 |
| H  | -3.5179 | -3.8133 | -2.7982 |
| H  | -3.8038 | -4.5320 | -5.1119 |
| H  | -4.4474 | -1.4190 | -2.4127 |
| H  | -3.8456 | 0.9507  | -2.8834 |
| H  | -2.6631 | 0.4220  | -4.1105 |
| H  | -4.4117 | 0.1394  | -4.3803 |
| H  | 1.8445  | 2.4915  | 4.3448  |
| H  | 2.2736  | 3.6059  | 3.0075  |
| H  | 5.8777  | -2.5735 | 5.4469  |
| H  | 2.3214  | 0.8878  | -0.7572 |

*Dihedral Angle = 240*

|   |         |         |         |
|---|---------|---------|---------|
| C | -1.6237 | 3.0005  | 1.4545  |
| C | -0.5544 | 3.6764  | 2.3183  |
| O | -0.4983 | 4.9091  | 2.4251  |
| C | -1.3355 | 3.1805  | -0.0428 |
| S | 0.2057  | 2.3341  | -0.6311 |
| N | 0.3166  | 2.8389  | 2.9547  |
| C | 1.4643  | 3.3624  | 3.6892  |
| C | 5.3092  | -1.7672 | 5.8730  |
| C | 3.8783  | -2.2793 | 5.5694  |
| C | 3.6283  | -2.2543 | 4.0792  |
| C | 3.1911  | -1.0820 | 3.4452  |
| C | 3.9679  | -3.3453 | 3.2621  |
| C | 3.1042  | -0.9858 | 2.0579  |
| C | 3.8758  | -3.2734 | 1.8723  |
| C | 3.4474  | -2.0867 | 1.2467  |
| O | 3.3891  | -2.0597 | -0.1048 |
| O | 1.8932  | 0.0000  | -0.7813 |
| N | 0.5941  | -2.4700 | -7.6904 |
| C | 1.8430  | -2.3317 | -8.0573 |
| N | 2.2229  | -2.5865 | -9.3819 |

|    |         |         |         |   |         |         |         |
|----|---------|---------|---------|---|---------|---------|---------|
| N  | 2.8364  | -2.0020 | -7.1771 | H | 5.4333  | -0.7410 | 5.4970  |
| C  | 2.6238  | -1.7556 | -5.7868 | H | 3.7612  | -3.3029 | 5.9624  |
| O  | 3.5749  | -1.4414 | -5.0595 | H | 3.1412  | -1.6485 | 6.0929  |
| N  | 0.8609  | -1.6614 | -4.0943 | H | 2.9136  | -0.2154 | 4.0530  |
| C  | -0.3783 | -2.2815 | -3.6361 | H | 4.3120  | -4.2746 | 3.7272  |
| C  | -1.4697 | -2.0592 | -4.7008 | H | 2.7553  | -0.0665 | 1.5886  |
| N  | -1.0099 | -2.5053 | -5.9845 | H | 4.1250  | -4.1293 | 1.2427  |
| C  | 1.2498  | -1.9202 | -5.3984 | H | 2.8819  | -1.2373 | -0.4082 |
| C  | 0.3122  | -2.2876 | -6.3602 | H | 1.3951  | -2.7170 | -9.9617 |
| C  | -0.8191 | -1.6807 | -2.3254 | H | 2.8461  | -1.8858 | -9.7836 |
| S  | -0.0018 | -2.3071 | -0.8852 | H | 3.8137  | -1.9877 | -7.4645 |
| C  | -1.7720 | -0.7023 | -2.2959 | H | 1.6029  | -1.5558 | -3.4012 |
| S  | -2.3481 | -0.0129 | -0.7531 | H | -0.2639 | -3.3775 | -3.4963 |
| C  | -2.4149 | -0.1568 | -3.5617 | H | -2.3637 | -2.6500 | -4.4172 |
| O  | -1.8164 | -0.6712 | -4.7731 | H | -1.6788 | -2.4658 | -6.7498 |
| C  | -2.3116 | 1.3639  | -3.6739 | H | -3.4878 | -0.4558 | -3.5445 |
| Mo | 0.0000  | 0.0000  | 0.0000  | H | -2.8922 | 1.8456  | -2.8775 |
| O  | 0.0000  | 0.0000  | 1.7219  | H | -1.2622 | 1.6708  | -3.5706 |
| H  | -2.5770 | 3.5005  | 1.6896  | H | -2.6955 | 1.6842  | -4.6530 |
| H  | -1.7288 | 1.9329  | 1.6944  | H | 1.8240  | 2.5971  | 4.3894  |
| H  | -2.1749 | 2.7883  | -0.6350 | H | 2.2869  | 3.6459  | 3.0111  |
| H  | -1.1991 | 4.2486  | -0.2673 | H | 6.0541  | -2.3976 | 5.3650  |
| H  | 0.3111  | 1.8512  | 2.6869  | H | 2.2722  | 0.8854  | -0.9393 |
| H  | 1.1551  | 4.2580  | 4.2430  |   |         |         |         |
| H  | 5.5290  | -1.7704 | 6.9536  |   |         |         |         |

## References

- (1) McNaughton, R. L.; Mondal, S.; Nemykin, V. N.; Basu, P.; Kirk, M. L. *Inorg. Chem.* **2005**, *44*, 8216.
- (2) McNaughton, R. L.; Tipton, A. A.; Rubie, N. D.; Conry, R. R.; Kirk, M. L. *Inorg. Chem.* **2000**, *39*, 5697.
- (3) Hernandez-Marin, E.; Seth, M.; Ziegler, T. *Inorg. Chem.* **2009**, *48*, 2880.
